# Supplementary material for: Rice stable carbon and nitrogen isotope values as potential indicators of watering and manuring regimes
Source: Frontiers journal article supplement (doi:10.3389/fearc.2024.1488754), 2025-01-09
Supplement: Table_3.xlsx [file Table_3.xlsx]

## Sheet: Pot experiment
ID	Type	Accession	Manuring	Watering	Runfile	Wt	C ug (drift corrected)	%C	normd13C	Runfile	Wt	N ug (drift corrected)	%N	normd15N
ORY001	Modern	MOD001 (W–DEP1)	1%	low	230130	1.05	416.538	39.6703	–30.126072384036	200810	4.17	55.6327	1.33412	12.6316
ORY002/003	Modern	MOD001 (W–DEP1)	1%	low	230130	1.055	406.323	38.5483	–29.8387129980399	200810	4.22	51.1341	1.21182	11.3052
ORY004/005	Modern	MOD001 (W–DEP1)	1%	low	230130	1.075	406.738	37.8529	–29.4844775772611	200810	4.215	55.4598	1.31575	11.5015
ORY006	Modern	MOD001 (W–DEP1)	1%	medium	230130	1.03	402.922	39.1186	–30.5082045377951	200810	4.24	58.8803	1.38869	13.1572
ORY007	Modern	MOD001 (W–DEP1)	1%	medium	230130	1.02	385.901	37.8334	–29.740623011546	200810	4.3	59.6612	1.38747	11.9966
ORY008/009	Modern	MOD001 (W–DEP1)	1%	medium	230130	1.0325	395.736	38.3159	–30.18123221808	200810	4.35	59.0907	1.35829	11.0972
ORY010	Modern	MOD001 (W–DEP1)	1%	high	200824A	1.08	436.113	40.3742	/	200810	4.24	59.9502	1.41413	13.6916
ORY011	Modern	MOD001 (W–DEP1)	1%	high	230130	1.09	420.101	38.5414	–30.8801539846421	230131	5.44	60.0176	1.10326	14.2985
ORY012	Modern	MOD001 (W–DEP1)	1%	high	230130	1.05	416.886	39.7034	–30.8830339523414	230131	4.92	59.3483	1.20627	13.7747
ORY013/014	Modern	MOD002 (W–dep1)	1%	low	230130/200824A	1.13167	431.563	38.1442	–30.1699042561466	200810/200811	4.285	59.6189	1.39147	12.6248
ORY015	Modern	MOD002 (W–dep1)	1%	low	200824A	1.08667	424.519	39.057	–30.1434604814193	200811	4.4	59.498	1.35223	11.7577
ORY016	Modern	MOD002 (W–dep1)	1%	low	200824A	1.1025	425.558	38.5956	–30.0204131487519	200811	4.25	56.344	1.32574	12.7214
ORY017	Modern	MOD002 (W–dep1)	1%	medium	200824A	1.11667	447.545	40.0997	–30.1816643997097	230131	5.1	63.7215	1.24944	14.1506
ORY018	Modern	MOD002 (W–dep1)	1%	medium	200824A	1.11667	445.332	39.8957	–29.9384289457134	230126	5.09	59.6911	1.17271	13.3188
ORY019	Modern	MOD002 (W–dep1)	1%	medium	200824A	1.055	427.344	40.5061	–30.5842226415829	200811	4.07	54.1167	1.32965	13.165
ORY020	Modern	MOD002 (W–dep1)	1%	high	200824A	1.09667	425.188	38.7459	–30.4799715869866	200811	4.095	52.2603	1.27622	13.0733
ORY021	Modern	MOD002 (W–dep1)	1%	high	200824A	1.05	409.352	38.9861	–30.8475801032127	230131	5.26	58.1306	1.10514	12.733
ORY022	Modern	MOD002 (W–dep1)	1%	high	200824A	1.0875	450.151	41.3967	–30.8342749306593	230131	4.85	52.7697	1.08804	14.2433
ORY023/024	Modern	MOD003 (S–DEP1)	1%	low	230130/200914	1.06833	419.595	39.2662	–29.8925929825073	200811	4.095	54.6067	1.33382	13.6108
ORY025	Modern	MOD003 (S–DEP1)	1%	low	190909	1.1	423.856	38.5324	–28.2473534543178	230131	4.8	59.689	1.24352	13.1506
ORY026	Modern	MOD003 (S–DEP1)	1%	low	190909	1.08	415.687	38.4895	–28.1111529763129	200811	4.4	63.306	1.43877	12.6363
ORY027	Modern	MOD003 (S–DEP1)	1%	medium	200914	1.12	448.397	40.0251	–29.7605398217669	230131	4.92	60.982	1.23947	12.3641
ORY028	Modern	MOD003 (S–DEP1)	1%	medium	190909	1.1	428.049	38.9135	–28.9905486167479	230131	4.61	59.6534	1.29405	12.7917
ORY029	Modern	MOD003 (S–DEP1)	1%	medium	190909	1.08	422.742	39.1428	–28.9227433313103	200813	4.42	50.8835	1.15121	11.7252
ORY030	Modern	MOD003 (S–DEP1)	1%	high	190909	1.105	437.009	39.5399	–29.2526777633695	200813	4.275	52.5691	1.22962	15.7704
ORY031	Modern	MOD003 (S–DEP1)	1%	high	200914	1.06667	453.354	42.4975	–28.3446427280178	230126	5.05	52.5648	1.04089	15.6463
ORY032	Modern	MOD003 (S–DEP1)	1%	high	190909	1.15	452.205	39.3221	–29.2199064264881	200813	4.09	50.973	1.24628	15.0518
ORY033	Modern	MOD004 (S–dep1)	1%	low	190909	1.12	438.247	39.1292	–29.5022287648715	200813	4.16	51.4772	1.23743	13.6107
ORY034	Modern	MOD004 (S–dep1)	1%	low	190909	1.11	427.57	38.5198	–29.337693838854	200813	4.03	51.03	1.26625	16.8689
ORY035	Modern	MOD004 (S–dep1)	1%	low	190909	1.1	431.698	39.2452	–29.3734999133639	200813	4.17	50.2218	1.20436	15.2864
ORY036	Modern	MOD004 (S–dep1)	1%	medium	190909	1.13	438.073	38.7675	–29.7772265733089	200813	4.42	53.0374	1.19994	13.0582
ORY037	Modern	MOD004 (S–dep1)	1%	medium	190909	1.17	462.666	39.5441	–29.7289037849218	200813	4.1	53.7844	1.31182	14.5701
ORY038	Modern	MOD004 (S–dep1)	1%	medium	190909	1.09	423.093	38.8158	–29.7519410850783	230126	4.63	49.2493	1.0637	12.936
ORY039	Modern	MOD004 (S–dep1)	1%	high	190909	1.08	425.814	39.4272	–29.8104010659397	230126	5.02	51.1426	1.01878	14.958
ORY040	Modern	MOD004 (S–dep1)	1%	high	190909	1.105	424.755	38.4242	–29.8102980610861	230126	5.43	57.8544	1.06546	15.1959
ORY041	Modern	MOD004 (S–dep1)	1%	high	190909	1.15	425.687	37.0162	–29.9102064184545	230131	5.41	58.6394	1.08391	12.963
ORY042	Heritage	HER001 (117264)	1%	low	190909	1.1	432.822	39.3474	–28.3320147918235	200818	4.26	69.2107	1.62466	11.3263
ORY043	Heritage	HER001 (117264)	1%	low	190909	1.1	440.613	40.0558	–28.8191650489492	200818	4.22	58.728	1.39166	10.7105
ORY044	Heritage	HER001 (117264)	1%	low	200914	1.0875	452.882	41.6445	–27.7584263332969	200818	4.09	77.2405	1.88852	11.2282
ORY045	Heritage	HER001 (117264)	1%	medium	190909	1.05	417.461	39.7582	–29.0640942635139	200818	4.16	61.7916	1.48537	10.2061
ORY046	Heritage	HER001 (117264)	1%	medium	230130	1.05	445.793	42.4564	–28.863105154368	200818	4.04	67.2292	1.66409	10.1117
ORY047	Heritage	HER001 (117264)	1%	medium	230130	1.02	411.489	40.342	–29.1334889249683	200818	4.15	62.3963	1.50353	10.0335
ORY048	Heritage	HER001 (117264)	1%	high	230130	1.05	409.498	38.9998	–29.0263263540082	200818	4.12	50.1975	1.21839	9.63392
ORY049	Heritage	HER001 (117264)	1%	high	230130	1.02	387.076	37.9487	–28.8816332274371	200818	4.03	54.7063	1.35748	11.3603
ORY050	Heritage	HER001 (117264)	1%	high	200914	1.06	425.978	40.1878	–29.4750717902741	230126	4.01	49.5703	1.23617	11.2765
ORY051	Heritage	HER001 (117264)	5% Manuring	medium	230130	1.07	403.462	37.7068	–28.6121065259157	200818	4.1	64.8477	1.58165	10.2608
ORY052	Heritage	HER001 (117264)	5% Manuring	medium	230130	1.08	422.674	39.1432	–29.3150438061494	200818	4.05	59.2675	1.4634	10.6126
ORY053	Heritage	HER001 (117264)	5% Manuring	high	230130	1.11	453.33	40.8405	–29.6277033784203	200818	4.09	52.6589	1.2875	13.639
ORY054	Heritage	HER001 (117264)	5% Manuring	high	230130	1.07	318.548	29.7709	–29.6342185665268	230126	4.34	53.8591	1.24099	11.7803
ORY060	Heritage	HER002 (128438)	1%	low	200914	1.12	450.719	40.2428	–29.0573860217835	230126	4.05	56.8158	1.40286	12.1173
ORY061	Heritage	HER002 (128438)	1%	low	200914	1.07	429.087	40.1016	–29.0277001051403	230126	4.18	61.5659	1.47287	11.7113
ORY062/063	Heritage	HER002 (128438)	1%	low	200914	1.115	445.689	39.9875	–28.4783709018987	230126	4.08	61.4406	1.50615	11.5094
ORY064	Heritage	HER002 (128438)	1%	medium	200914	1.08	433.122	40.1083	–30.197957567802	230126	4.12	54.6427	1.32628	13.7235
ORY065	Heritage	HER002 (128438)	1%	medium	200914	1.11	441.034	39.7328	–28.9856019794354	230126	4.17	55.1745	1.32313	16.6303
ORY066	Heritage	HER002 (128438)	1%	medium	230130	1.05	429.748	40.9284	–29.8711711614943	230126	4.62	58.7728	1.27214	13.8455
ORY067	Heritage	HER002 (128438)	1%	high	200914	1.10333	434.267	39.3638	–28.8176330804239	230126	4.955	57.5611	1.16165	16.8036
ORY068	Heritage	HER002 (128438)	1%	high	200914	1.09	433.549	39.7702	–29.8498422059662	200819	4.24	50.9401	1.20142	16.5024
ORY069	Heritage	HER002 (128438)	1%	high	200826	1.07	419.141	39.1719	–28.9185553052893	200819	4.32	55.5651	1.28623	15.7909
ORY070	Heritage	HER002 (128438)	5% Manuring	medium	190911–v2	1.13	459.527	40.6661	–29.2668492207503	200819	4.22	58.1996	1.37897	16.9074
ORY071	Heritage	HER002 (128438)	5% Manuring	medium	190911–v2	1.09	442.947	40.6373	–28.8553866397942	200819	4.15	59.3279	1.42959	14.5398
ORY072	Heritage	HER002 (128438)	5% Manuring	medium	190911–v2	1.09	426.998	39.1741	–30.1498572352498	200819	4.09	53.5586	1.3095	14.1145
ORY073	Heritage	HER002 (128438)	5% Manuring	high	190911–v2	1.1	444.878	40.4435	–28.7162525533793	200819	4.05	58.2072	1.43722	16.2064
ORY074	Heritage	HER002 (128438)	5% Manuring	high	190911–v2	1.1	440.646	40.0587	–28.7699137842905	200819	4.28	54.0956	1.26392	16.433
ORY075	Heritage	HER002 (128438)	5% Manuring	high	190911–v2	1.06	404.051	38.118	–29.1304733201009	200819	4.43	59.3149	1.33894	16.4781
ORY076	Heritage	HER003 (132278)	1%	low	190911	1.06	423.221	40.3233	–29.539689314102	200819	4.2	62.9323	1.49839	11.1245
ORY077	Heritage	HER003 (132278)	1%	low	190911	1.045	415.925	40.5341	–29.0174919807179	200819	4.35	64.6791	1.48688	11.005
ORY078/079	Heritage	HER003 (132278)	1%	low	200826	1.1	435.531	39.599	–29.1635635628382	200819/230126	4.175	56.9582	1.36473	11.3075
ORY080	Heritage	HER003 (132278)	1%	medium	200826	1.08	429.899	39.8054	–29.2968732757063	200825	4.225	55.8882	1.32316	10.8953
ORY081	Heritage	HER003 (132278)	1%	medium	200826	1.08	440.312	40.7696	–30.1510110697354	230126	4.39	56.8792	1.29565	10.2633
ORY082	Heritage	HER003 (132278)	1%	medium	200826	1.08	406.719	37.6592	–30.0182906370748	230126	4.88	54.5352	1.11752	10.5561
ORY083	Heritage	HER003 (132278)	1%	high	200826	1.04	433.395	41.6726	–29.7482162082039	230201	4.99	51.8191	1.03846	11.9442
ORY084	Heritage	HER003 (132278)	1%	high	200826	1.07333	424.862	39.6246	–29.7482903702253	230126	5.36	57.0955	1.06521	13.275
ORY085	Heritage	HER003 (132278)	1%	high	200826	1.0675	429.433	40.2183	–29.7313203690896	230126	5.43	57.683	1.0623	13.7583
ORY086	Heritage	HER003 (132278)	5% Manuring	medium	200826	1.07	420.982	39.34	–30.0654723967128	200825	4.31	51.1423	1.1866	15.6379
ORY087	Heritage	HER003 (132278)	5% Manuring	medium	200826	1.07	426.035	39.8163	–30.1966661578492	200825	4.21	57.0718	1.35563	16.8784
ORY088	Heritage	HER003 (132278)	5% Manuring	medium	200826	1.11	448.103	40.3696	–30.123239629584	200825	4.21	56.291	1.33708	15.9114
ORY089	Heritage	HER003 (132278)	5% Manuring	high	200826	1.09	429.276	39.3831	–30.2903674505846	230126	4.91	56.0686	1.14193	16.3462
ORY090	Heritage	HER003 (132278)	5% Manuring	high	200826	1.07	416.805	38.9537	–30.2177818701428	200825	4.13	51.4489	1.24619	17.1216
ORY091	Heritage	HER003 (132278)	5% Manuring	high	200826	1.06	425.954	40.1844	–30.0362758293913	200825	4.35	58.8459	1.35278	16.3523

## Sheet: Fields
ID	SamplePoint	Plot	Group	Year	Watering	ManureLevel	ManureType	Accession	Sowing	Herbicide	Pesticide	ManureName	ManureAmount	NitrogenAmount	Collections	Runfile	Wt	C ug (drift corrected)	%C	δ13C (VPDB)	Runfile	Wt	N ug (drift corrected)	%N	δ15N (AIR)
SK1	Buyeo	/	/	2016	Paddy	/	Organic Manure	/	/	/	/	/	222	5	SKor Pad Org	180814	1.09	449.44	41.233	-26.3074	180814A	4.98	65.014	1.3055	6.74379
SK2	Buyeo	/	/	2016	Paddy	/	Organic Manure	/	/	/	/	/	222	5	SKor Pad Org	180814	1.13	435.24	38.5168	-27.0837	180814A	4.39	57.3831	1.30713	7.25428
SK3	Buyeo	/	/	2016	Paddy	/	Organic Manure	/	/	/	/	/	222	5	SKor Pad Org	180814	1	386.287	38.6287	-26.4809	180814A	4.73	59.6692	1.26151	7.00019
SK4	Buyeo	/	/	2016	Paddy	/	Organic Manure	/	/	/	/	/	222	5	SKor Pad Org	180814	1.06	376.064	35.4777	-27.3912	180814A	4.27	52.1126	1.22044	10.5961
SK5	Buyeo	/	/	2016	Paddy	/	Organic Manure	/	/	/	/	/	222	5	SKor Pad Org	180814	1.09	381.475	34.9977	-26.9256	180814A	4.96	73.5507	1.48288	9.71939
SK6	Buyeo	/	/	2016	Paddy	/	Organic Manure	/	/	/	/	/	222	5	SKor Pad Org	180814	1	398.632	39.8801	-26.7984	180814A	4.49	51.3375	1.14332	6.96591
SK7	Buyeo	/	/	2016	Paddy	/	Organic Manure	/	/	/	/	/	222	5	SKor Pad Org	180814	1.04	368.587	35.4411	-26.5631	180814A	4.26	53.2674	1.25041	8.90272
SK8	Buyeo	/	/	2016	Paddy	/	Organic Manure	/	/	/	/	/	222	5	SKor Pad Org	180814	1.01	393.771	38.9873	-26.5796	180814A	5.06	62.2508	1.23025	6.38482
SK9	Buyeo	/	/	2016	Paddy	/	Organic Manure	/	/	/	/	/	222	5	SKor Pad Org	180814	0.97	376.007	38.7636	-27.3878	180814A	4.43	57.3392	1.29434	8.34192
SK10	Buyeo	/	/	2016	Paddy	/	Organic Manure	/	/	/	/	/	222	5	SKor Pad Org	180814	1.08	418.743	38.7725	-27.4314	180814A	4.34	59.7491	1.37671	11.3318
SHC27M	Anyway Farm	C27M	/	2017	Paddy	Runbao 10kg	Organic Manure	/	/	/	/	Runbao	440	10	SHai Pad Org [2017]	180809a	1.12	439.573	39.2476	-27.3774	230201	4.89	57.2572	1.1709	5.5245
SHC27N	Anyway Farm	C27N	/	2017	Paddy	Runbao 10kg	Organic Manure	/	/	/	/	Runbao	440	10	SHai Pad Org [2017]	180809a	1.08	435.614	40.3347	-28.5819	230201	4.35	61.3283	1.40985	7.13673
SHC27S	Anyway Farm	C27S	/	2017	Paddy	Runbao 10kg	Organic Manure	/	/	/	/	Runbao	440	10	SHai Pad Org [2017]	180809a	1.01	406.453	40.2428	-28.1797	230201	4.18	68.3942	1.63622	6.12306
SHC28M	Anyway Farm	C28M	/	2017	Paddy	Runbao 5kg	Organic Manure	/	/	/	/	Runbao	220	5	SHai Pad Org [2017]	180809a	1.16	433.107	37.3368	-27.9371	230201	4.37	56.8068	1.29993	4.45075
SHC28N	Anyway Farm	C28NDA	/	2017	Paddy	Runbao 5kg	Organic Manure	/	/	/	/	Runbao	220	5	SHai Pad Org [2017]	180809a	1.005	405.991	40.4001	-27.7642	230201	4.68	55.6269	1.18861	6.73271
SHC28S	Anyway Farm	C28S	/	2017	Paddy	Runbao 5kg	Organic Manure	/	/	/	/	Runbao	220	5	SHai Pad Org [2017]	180809a	1.18	453.455	38.4284	-28.0384	230201	4.56	55.1095	1.20854	4.76341
SHC29M	Anyway Farm	C29MDA	/	2017	Paddy	Runbao 10kg	Organic Manure	/	/	/	/	Runbao	440	10	SHai Pad Org [2017]	180814	0.97	412.35	42.5451	-27.3269	230201	4.31	47.7298	1.10742	5.23446
SHC29N	Anyway Farm	C29N	/	2017	Paddy	Runbao 10kg	Organic Manure	/	/	/	/	Runbao	440	10	SHai Pad Org [2017]	180809a	1.05	409.836	39.032	-27.6246	230201	4.25	44.3482	1.04349	5.48276
SHC29S	Anyway Farm	C29S	/	2017	Paddy	Runbao 10kg	Organic Manure	/	/	/	/	Runbao	440	10	SHai Pad Org [2017]	180809a	1.04	424.7	40.8366	-27.7349	230201	4.66	47.4699	1.01867	6.20877
SHC30M	Anyway Farm	C30M	/	2017	Paddy	Runbao 40kg	Organic Manure	/	/	/	/	Runbao	1740	40	SHai Pad Org [2017]	180809a	1.05	339.392	32.3231	-27.3091	230201	4.14	45.0775	1.08884	5.08661
SHC30S	Anyway Farm	C30S	/	2017	Paddy	Runbao 40kg	Organic Manure	/	/	/	/	Runbao	1740	40	SHai Pad Org [2017]	180809a	1.15	459.845	39.9865	-26.7967	230201	4.55	46.4084	1.01996	5.28607
SHC31M	Anyway Farm	C31M	/	2017	Paddy	Bokashi 5kg	Organic Manure	/	/	/	/	Bokashi	80	5	SHai Pad Org [2017]	180809a	1	408.018	40.8018	-28.1106	230201	4.84	49.5628	1.02403	4.95262
SHC31N	Anyway Farm	C31N	/	2017	Paddy	Bokashi 5kg	Organic Manure	/	/	/	/	Bokashi	80	5	SHai Pad Org [2017]	180809a	1.01	419.363	41.521	-27.8517	230126	4.13	51.0954	1.23718	6.45995
SHC31S	Anyway Farm	C31S	/	2017	Paddy	Bokashi 5kg	Organic Manure	/	/	/	/	Bokashi	80	5	SHai Pad Org [2017]	180809a	1.07	407.761	38.1085	-27.8256	230201	4.44	54.8843	1.23613	4.90999
SHC32M	Anyway Farm	C32M	/	2017	Paddy	Control	Control	/	/	/	/	Control	0	0	SHai Pad Ctr [2017]	180809a	1.02	422.349	41.4067	-27.3329	230201	4.22	44.9936	1.0662	4.66146
SHC32N	Anyway Farm	C32NDA	/	2017	Paddy	Control	Control	/	/	/	/	Control	0	0	SHai Pad Ctr [2017]	180809a	1.05	435.477	41.4772	-28.1021	230201	4.29	53.1718	1.23944	5.16388
SHC32S	Anyway Farm	C32S	/	2017	Paddy	Control	Control	/	/	/	/	Control	0	0	SHai Pad Ctr [2017]	180809a	1	439.759	43.9759	-27.5191	230201	4.31	47.5518	1.10329	4.56728
SHC33M	Anyway Farm	C33M	/	2017	Paddy	Runbao 5kg	Organic Manure	/	/	/	/	Runbao	220	5	SHai Pad Org [2017]	180809a	1	435.194	43.5194	-27.6771	230201	4.71	52.6309	1.11743	5.11952
SHC33N	Anyway Farm	C33N	/	2017	Paddy	Runbao 5kg	Organic Manure	/	/	/	/	Runbao	220	5	SHai Pad Org [2017]	180809a	1.02	402.977	39.5075	-27.7169	230201	4.29	53.9352	1.25693	5.69344
SHC33S	Anyway Farm	C33S	/	2017	Paddy	Runbao 5kg	Organic Manure	/	/	/	/	Runbao	220	5	SHai Pad Org [2017]	180809a	0.97	400.729	41.3122	-27.3081	230201	4.22	48.2679	1.14379	6.1547
SHC34M	Anyway Farm	C34M	/	2017	Paddy	Runbao 10kg	Organic Manure	/	/	/	/	Runbao	440	10	SHai Pad Org [2017]	180809a	1.04	392.895	37.7784	-27.2441	230201	4.52	52.5091	1.16171	5.80046
SHC34N	Anyway Farm	C34N	/	2017	Paddy	Runbao 10kg	Organic Manure	/	/	/	/	Runbao	440	10	SHai Pad Org [2017]	180809a	1.07	417.409	39.0102	-27.9395	230201	4.31	54.974	1.2755	6.94477
SHC34S	Anyway Farm	C34S	/	2017	Paddy	Runbao 10kg	Organic Manure	/	/	/	/	Runbao	440	10	SHai Pad Org [2017]	180809a	1.16	474.659	40.9188	-27.1847	230201	4.59	47.305	1.03061	4.69609
SHC35M	Anyway Farm	C35M	/	2017	Paddy	Runbao 40kg	Organic Manure	/	/	/	/	Runbao	1740	40	SHai Pad Org [2017]	180809a	1.07	456.24	42.6393	-27.1179	230201	4.36	47.2094	1.08278	5.96587
SHC35N	Anyway Farm	C35N	/	2017	Paddy	Runbao 40kg	Organic Manure	/	/	/	/	Runbao	1740	40	SHai Pad Org [2017]	180814	1.02	423.973	41.9776	-27.6643	230201	4.24	47.5133	1.1206	7.27912
SHC35S	Anyway Farm	C35S	/	2017	Paddy	Runbao 40kg	Organic Manure	/	/	/	/	Runbao	1740	40	SHai Pad Org [2017]	180809a	1.01	395.607	39.169	-27.1241	230201	4.64	51.4594	1.10898	5.18474
SHD15-1	Anyway Farm	D15-1	/	2017	Paddy	Bokashi 5kg	Organic Manure	/	/	/	/	Bokashi	80	5	SHai Pad Org [2017]	180809a	1.06	409.913	38.671	-28.0786	230131	4.31	74.8566	1.73681	5.09157
SHD15-2	Anyway Farm	D15-2	/	2017	Paddy	Bokashi 5kg	Organic Manure	/	/	/	/	Bokashi	80	5	SHai Pad Org [2017]	180809a	0.99	413.656	41.7834	-27.7656	230131	4.67	61.363	1.31398	5.08848
SHD15-3	Anyway Farm	D15-3	/	2017	Paddy	Bokashi 5kg	Organic Manure	/	/	/	/	Bokashi	80	5	SHai Pad Org [2017]	180809a	1.01	423.973	41.9776	-28.1627	230131	4.26	65.6448	1.54096	6.44047
SHD16	Anyway Farm	D16	/	2017	Paddy	Control	Control	/	/	/	/	Control	0	0	SHai Pad Ctr [2017]	180809a	1	403.192	40.3192	-27.3814	230131	4.74	56.8367	1.19909	7.43454
SHD16-2	Anyway Farm	D16-2	/	2017	Paddy	Control	Control	/	/	/	/	Control	0	0	SHai Pad Ctr [2017]	180809a	1.21	490.388	40.5279	-28.4008	230131	4.38	60.9676	1.39195	6.40435
SHD16-3	Anyway Farm	D16-3	/	2017	Paddy	Control	Control	/	/	/	/	Control	0	0	SHai Pad Ctr [2017]	180809a	1	394.295	39.4295	-27.1149	230131	4.27	52.7748	1.23594	6.49762
SHD17M	Anyway Farm	D17M	/	2017	Paddy	Runbao 5kg	Organic Manure	/	/	/	/	Runbao	220	5	SHai Pad Org [2017]	180814	1.04	427.141	42.7141	-27.7381	230131	4.15	59.931	1.44412	5.4705
SHD17N	Anyway Farm	D17N	/	2017	Paddy	Runbao 5kg	Organic Manure	/	/	/	/	Runbao	220	5	SHai Pad Org [2017]	180809a	1.05	455.604	43.3909	-27.6645	230131	4.28	52.2887	1.2217	5.97987
SHD17S	Anyway Farm	D17S	/	2017	Paddy	Runbao 5kg	Organic Manure	/	/	/	/	Runbao	220	5	SHai Pad Org [2017]	180809a	1.1	416.821	37.8928	-28.0719	230131	4.42	51.9107	1.17445	6.90285
SHD18M	Anyway Farm	D18M	/	2017	Paddy	Bokashi 5kg	Organic Manure	/	/	/	/	Bokashi	80	5	SHai Pad Org [2017]	180809a	1.06	415.854	39.2316	-27.9703	230131	4.12	56.4451	1.37041	7.3278
SHD18N	Anyway Farm	D18N	/	2017	Paddy	Bokashi 5kg	Organic Manure	/	/	/	/	Bokashi	80	5	SHai Pad Org [2017]	180809a	1.05	418.135	39.8224	-27.8128	230131	4.32	62.1637	1.43897	5.14803
SHD18S	Anyway Farm	D18SDA	/	2017	Paddy	Bokashi 5kg	Organic Manure	/	/	/	/	Bokashi	80	5	SHai Pad Org [2017]	180809a	1	427.141	42.7141	-27.7292	230131	4.13	61.4379	1.4876	6.65686
SHD19M	Anyway Farm	D19M	/	2017	Paddy	Runbao 40kg	Organic Manure	/	/	/	/	Runbao	1740	40	SHai Pad Org [2017]	180809a	1.03	417.459	40.53	-27.5122	230131	4.23	54.2723	1.28303	7.44544
SHD19N	Anyway Farm	D19N	/	2017	Paddy	Runbao 40kg	Organic Manure	/	/	/	/	Runbao	1740	40	SHai Pad Org [2017]	180809a	0.96	369.92	38.5334	-27.8796	230131	4.11	51.5108	1.2533	5.92291
SHD19S	Anyway Farm	D19S	/	2017	Paddy	Runbao 40kg	Organic Manure	/	/	/	/	Runbao	1740	40	SHai Pad Org [2017]	180809a	1.04	399.421	38.4059	-28.0537	230131	4.58	57.8016	1.26204	7.69857
SHD20M	Anyway Farm	D20M	/	2017	Paddy	Control	Control	/	/	/	/	Control	0	0	SHai Pad Ctr [2017]	180809a	1.08	427.403	39.5743	-27.3517	230131	4.42	55.1309	1.2473	5.31023
SHD20N	Anyway Farm	D20NDA	/	2017	Paddy	Control	Control	/	/	/	/	Control	0	0	SHai Pad Ctr [2017]	230130	1.07	407.697	38.1026	-28.068	230131	4.27	51.9511	1.21665	6.32833
SHD20S	Anyway Farm	D20S	/	2017	Paddy	Control	Control	/	/	/	/	Control	0	0	SHai Pad Ctr [2017]	180809a	1	373.825	37.3825	-27.7749	230131	4.58	53.4039	1.16602	8.11557
SH318	Anyway Farm	C31S	/	2019	Paddy	Bokashi 5kg	Organic Manure&Faba	/	/	/	/	Bokashi	80	5	SHai Pad Org [2019]	211129	1.07	430.101	40.1964	-26.793	211130	4.14	54.2036	1.30927	4.51142
SH319	Anyway Farm	C27M	/	2019	Paddy	Runbao 10kg	Organic Manure&Faba	/	/	/	/	Runbao	440	10	SHai Pad Org [2019]	211129	1.09	439.18	40.2918	-26.9779	211130	4.07	49.9567	1.22744	3.54497
SH320	Anyway Farm	C30S	/	2019	Paddy	Runbao 40kg	Organic Manure&Faba	/	/	/	/	Runbao	1740	40	SHai Pad Org [2019]	211129	1.14	473.152	41.5045	-27.0067	211130	4.28	55.6916	1.3012	3.204
SH321	Anyway Farm	C31N	/	2019	Paddy	Bokashi 5kg	Organic Manure&Faba	/	/	/	/	Bokashi	80	5	SHai Pad Org [2019]	211129	1.14	443.508	38.9042	-27.1155	211130	4.41	59.2171	1.34279	3.72958
SH322	Anyway Farm	C31M	/	2019	Paddy	Bokashi 5kg	Organic Manure&Faba	/	/	/	/	Bokashi	80	5	SHai Pad Org [2019]	211129	1.03	408.569	39.6669	-26.9312	211130	4.08	51.7194	1.26763	3.70658
SH323	Anyway Farm	C27S	/	2019	Paddy	Runbao 10kg	Organic Manure&Faba	/	/	/	/	Runbao	440	10	SHai Pad Org [2019]	211129	1.08	438.122	40.5669	-27.2141	211130	4.1	50.6353	1.23501	3.74654
SH324	Anyway Farm	C32S	/	2019	Paddy	Control	Control	/	/	/	/	Control	0	0	SHai Pad Ctr [2019]	211129	1.06	414.276	39.0826	-26.9452	211130	4.17	51.9635	1.24613	3.26557
SH326	Anyway Farm	C29S	/	2019	Paddy	Runbao 10kg	Organic Manure&Faba	/	/	/	/	Runbao	440	10	SHai Pad Org [2019]	211129	1.08	428.131	39.6417	-26.7903	211130	4.09	48.887	1.19528	2.72745
SH327	Anyway Farm	C30M	/	2019	Paddy	Runbao 40kg	Organic Manure&Faba	/	/	/	/	Runbao	1740	40	SHai Pad Org [2019]	211129	1.11	445.101	40.1205	-27.1346	211130	4.185	59.3591	1.41837	3.7435
SH328	Anyway Farm	C33S	/	2019	Paddy	Runbao 5kg	Organic Manure&Faba	/	/	/	/	Runbao	220	5	SHai Pad Org [2019]	211129	1.09	472.137	43.3153	-27.079	211130	4.07	54.4041	1.33671	3.13625
SH329	Anyway Farm	C33M	/	2019	Paddy	Runbao 5kg	Organic Manure&Faba	/	/	/	/	Runbao	220	5	SHai Pad Org [2019]	211129	1.06	438.964	41.4117	-27.0844	211130	4.28	58.3337	1.36294	3.28318
SH331	Anyway Farm	C30N	/	2019	Paddy	Runbao 40kg	Organic Manure&Faba	/	/	/	/	Runbao	1740	40	SHai Pad Org [2019]	211129	1.06	436.559	41.1848	-27.2021	211130	4.24	55.6876	1.31339	3.06361
SH332	Anyway Farm	C33N	/	2019	Paddy	Runbao 5kg	Organic Manure&Faba	/	/	/	/	Runbao	220	5	SHai Pad Org [2019]	211129	1.05	421.021	40.0973	-27.0728	211201	4.26	62.3446	1.46349	3.21761
SH333	Anyway Farm	C27N	/	2019	Paddy	Runbao 10kg	Organic Manure&Faba	/	/	/	/	Runbao	440	10	SHai Pad Org [2019]	211129	1.13	446.65	39.5265	-27.0214	211201	4.16	54.204	1.30298	4.50335
SH334	Anyway Farm	C28N	/	2019	Paddy	Runbao 5kg	Organic Manure&Faba	/	/	/	/	Runbao	220	5	SHai Pad Org [2019]	211129	1.13	428.334	37.9056	-27.1487	211201	4.18	55.6061	1.33029	4.56818
SH335	Anyway Farm	C28S	/	2019	Paddy	Runbao 5kg	Organic Manure&Faba	/	/	/	/	Runbao	220	5	SHai Pad Org [2019]	211129	1.13	458.25	40.5531	-27.0132	211201	4.17	52.9598	1.27002	3.37344
SH336	Anyway Farm	C32N	/	2019	Paddy	Control	Control	/	/	/	/	Control	0	0	SHai Pad Ctr [2019]	211129	1.05	422.613	40.2488	-26.7204	211201	4.32	60.2284	1.39418	3.02951
SH337	Anyway Farm	C29N	/	2019	Paddy	Runbao 10kg	Organic Manure&Faba	/	/	/	/	Runbao	440	10	SHai Pad Org [2019]	211129	1.11	476.391	42.9181	-26.7982	211201	4.21	55.5776	1.32013	3.1277
SH338	Anyway Farm	C28M	/	2019	Paddy	Runbao 5kg	Organic Manure&Faba	/	/	/	/	Runbao	220	5	SHai Pad Org [2019]	211129	1.04	434.007	41.7458	-26.9188	211201	4.21	53.7213	1.27604	3.9229
SH339	Anyway Farm	C34M-2	/	2019	Paddy	Runbao 10kg	Organic Manure&Faba	/	/	/	/	Runbao	440	10	SHai Pad Org [2019]	211129	1.1	529.132	48.1029	-26.788	211201	4.21	58.5295	1.39025	2.4279
SH340	Anyway Farm	C34S	/	2019	Paddy	Runbao 10kg	Organic Manure&Faba	/	/	/	/	Runbao	440	10	SHai Pad Org [2019]	211129	1.16	517.667	44.6264	-26.9117	211201	4.18	57.3743	1.37259	2.88975
SH341	Anyway Farm	C29M	/	2019	Paddy	Runbao 10kg	Organic Manure&Faba	/	/	/	/	Runbao	440	10	SHai Pad Org [2019]	211129	1.1	466.861	42.4419	-26.9106	211201	4.19	59.9796	1.43213	2.90643
SH342	Anyway Farm	C32M	/	2019	Paddy	Control	Control	/	/	/	/	Control	0	0	SHai Pad Ctr [2019]	211129	1.02	421.345	41.3083	-27.4237	211201	4.27	57.1756	1.33901	1.93251
LY065	HuayiCoop (P3)	Plot2 North	Plot2	2019	Dry	Base: NPK 25kg (25:8:15) and organic 40kg, tiller: NPKS 5kg	Chemical & Organic	Yueguang	Transplanted	No	Once	/	/	/	SDon Dry CheOrg Loc3 [2019]	211129	1.08	409.641	37.9297	-26.6193	211201	4.07	49.5962	1.21858	6.05815
LY066	HuayiCoop (P3)	Plot2 North	Plot2	2019	Dry	Base: NPK 25kg (25:8:15) and organic 40kg, tiller: NPKS 5kg	Chemical & Organic	Yueguang	Transplanted	No	Once	/	/	/	SDon Dry CheOrg Loc3 [2019]	211129	1.05	450.098	42.8665	-27.1106	211201	4.32	55.0846	1.27511	4.4622
LY067	HuayiCoop (P3)	Plot2 Middle	Plot2	2019	Dry	Base: NPK 25kg (25:8:15) and organic 40kg, tiller: NPKS 5kg	Chemical & Organic	Yueguang	Transplanted	No	Once	/	/	/	SDon Dry CheOrg Loc3 [2019]	211129	1.18	485.538	41.1473	-26.8468	211202	4.26	56.2358	1.32009	4.58161
LY068	HuayiCoop (P3)	Plot2 Middle	Plot2	2019	Dry	Base: NPK 25kg (25:8:15) and organic 40kg, tiller: NPKS 5kg	Chemical & Organic	Yueguang	Transplanted	No	Once	/	/	/	SDon Dry CheOrg Loc3 [2019]	211129	1.06	398.847	37.6271	-26.5908	211202	4.08	58.8129	1.44149	4.56759
LY069	HuayiCoop (P3)	Plot2 South	Plot2	2019	Dry	Base: NPK 25kg (25:8:15) and organic 40kg, tiller: NPKS 5kg	Chemical & Organic	Yueguang	Transplanted	No	Once	/	/	/	SDon Dry CheOrg Loc3 [2019]	211129	1.05	423.087	40.294	-26.99	211202	4.3	58.3858	1.35781	2.95361
LY070	HuayiCoop (P3)	Plot2 South	Plot2	2019	Dry	Base: NPK 25kg (25:8:15) and organic 40kg, tiller: NPKS 5kg	Chemical & Organic	Yueguang	Transplanted	No	Once	/	/	/	SDon Dry CheOrg Loc3 [2019]	211129	1.1	449.387	40.8539	-27.1758	211202	4.25	49.8041	1.17186	2.95233
LY071	HuayiCoop (P3)	Plot3 North	Plot3	2019	Dry	Base: NPK 25kg (25:8:15) and organic 40kg, tiller: NPKS 5kg	Chemical & Organic	Yueguang	Transplanted	No	Once	/	/	/	SDon Dry CheOrg Loc3 [2019]	211209-rep	1.06	459.437	43.3431	-26.5885	211202	4.01	60.5219	1.50928	4.61888
LY072	HuayiCoop (P3)	Plot3 North	Plot3	2019	Dry	Base: NPK 25kg (25:8:15) and organic 40kg, tiller: NPKS 5kg	Chemical & Organic	Tianjin 128	Transplanted	No	Once	/	/	/	SDon Dry CheOrg Loc3 [2019]	211209-rep	1.02	435.073	42.6542	-26.6078	211202	4.21	67.0219	1.59197	4.20719
LY073	HuayiCoop (P3)	Plot3 Middle	Plot3	2019	Dry	Base: NPK 25kg (25:8:15) and organic 40kg, tiller: NPKS 5kg	Chemical & Organic	Tianjin 128	Transplanted	No	Once	/	/	/	SDon Dry CheOrg Loc3 [2019]	211209-rep	1.03	436.608	42.3891	-25.7731	211202	4.1	61.3223	1.49567	4.87714
LY074	HuayiCoop (P3)	Plot3 Middle	Plot3	2019	Dry	Base: NPK 25kg (25:8:15) and organic 40kg, tiller: NPKS 5kg	Chemical & Organic	Tianjin 128	Transplanted	No	Once	/	/	/	SDon Dry CheOrg Loc3 [2019]	211209-rep	1.08	448.92	41.5667	-26.2379	211202	4.05	57.9576	1.43105	4.14529
LY075	HuayiCoop (P3)	Plot3 South	Plot3	2019	Dry	Base: NPK 25kg (25:8:15) and organic 40kg, tiller: NPKS 5kg	Chemical & Organic	Tianjin 128	Transplanted	No	Once	/	/	/	SDon Dry CheOrg Loc3 [2019]	211209-rep	1.02	416.062	40.7904	-26.6458	211202	4.12	65.1765	1.58195	5.423
LY076	HuayiCoop (P3)	Plot3 South	Plot3	2019	Dry	Base: NPK 25kg (25:8:15) and organic 40kg, tiller: NPKS 5kg	Chemical & Organic	Tianjin 128	Transplanted	No	Once	/	/	/	SDon Dry CheOrg Loc3 [2019]	211209-rep	1.06	420.995	39.7165	-26.2406	211202	4.16	57.3446	1.37872	6.08867
LY077	HuayiCoop (P3)	Plot1 North	Plot1	2019	Dry	Base: NPK 25kg (25:8:15) and organic 40kg, tiller: NPKS 5kg	Chemical & Organic	Tianjin 128	Transplanted	No	Once	/	/	/	SDon Dry CheOrg Loc3 [2019]	211209-rep	1.08	433.205	40.1116	-25.9713	211202	4.24	64.7548	1.52724	6.97211
LY078	HuayiCoop (P3)	Plot1 North	Plot1	2019	Dry	Base: NPK 25kg (25:8:15) and organic 40kg, tiller: NPKS 5kg	Chemical & Organic	Yueguang	Direct sowed	No	Once	/	/	/	SDon Dry CheOrg Loc3 [2019]	211209-rep	1.04	391.896	37.6823	-26.2795	211202	4.18	64.2319	1.53665	6.84758
LY079	HuayiCoop (P3)	Plot1 Middle	Plot1	2019	Dry	Base: NPK 25kg (25:8:15) and organic 40kg, tiller: NPKS 5kg	Chemical & Organic	Yueguang	Direct sowed	No	Once	/	/	/	SDon Dry CheOrg Loc3 [2019]	211209-rep	1	411.171	41.1171	-26.6091	211202	4.09	59.8189	1.46256	5.33361
LY080	HuayiCoop (P3)	Plot1 Middle	Plot1	2019	Dry	Base: NPK 25kg (25:8:15) and organic 40kg, tiller: NPKS 5kg	Chemical & Organic	Yueguang	Direct sowed	No	Once	/	/	/	SDon Dry CheOrg Loc3 [2019]	211209-rep	1.05	414.587	39.4972	-26.5477	211207	4.03	56.5823	1.40403	6.671
LY081	HuayiCoop (P3)	Plot1 South	Plot1	2019	Dry	Base: NPK 25kg (25:8:15) and organic 40kg, tiller: NPKS 5kg	Chemical & Organic	Yueguang	Direct sowed	No	Once	/	/	/	SDon Dry CheOrg Loc3 [2019]	211209-rep	1.05	430.657	41.0149	-26.1598	211207	4.06	64.878	1.59798	3.92968
LY082	HuayiCoop (P3)	Plot1 South	Plot1	2019	Dry	Base: NPK 25kg (25:8:15) and organic 40kg, tiller: NPKS 5kg	Chemical & Organic	Yueguang	Direct sowed	No	Once	/	/	/	SDon Dry CheOrg Loc3 [2019]	211209-rep	1.06	427.475	40.3279	-25.7579	211207	4.16	62.4068	1.50016	6.3161
LY084	Dongshuihu Village(P2)	Plot1 West	/	2019	Dry	Base: NPK 50kg (20:10:20) and organic 40kg, tiller: Urea 16kg	Chemical & Organic	Yueguang	Direct sowed	200 g/666 m2	Twice	ShiKeFeng	/	/	SDon Dry CheOrg Loc2 [2019]	211209-rep	1.06	432.107	40.7648	-25.7486	211207	4.25	60.3518	1.42004	1.8216
LY085	Dongshuihu Village(P2)	Plot1 Middle	/	2019	Dry	Base: NPK 50kg (20:10:20) and organic 40kg, tiller: Urea 16kg	Chemical & Organic	Yueguang	Direct sowed	200 g/666 m2	Twice	ShiKeFeng	/	/	SDon Dry CheOrg Loc2 [2019]	211209-rep	1.05	433.604	41.2956	-25.7043	211207	4.28	63.5632	1.48512	0.94302
LY086	Dongshuihu Village(P2)	Plot1 Middle	/	2019	Dry	Base: NPK 50kg (20:10:20) and organic 40kg, tiller: Urea 16kg	Chemical & Organic	Yueguang	Direct sowed	200 g/666 m2	Twice	ShiKeFeng	/	/	SDon Dry CheOrg Loc2 [2019]	211209-rep	1.03	439.121	42.6331	-26.0848	211207	4.07	55.9174	1.37389	0.851409
LY087	Dongshuihu Village(P2)	Plot1 East	/	2019	Dry	Base: NPK 50kg (20:10:20) and organic 40kg, tiller: Urea 16kg	Chemical & Organic	Yueguang	Direct sowed	200 g/666 m2	Twice	ShiKeFeng	/	/	SDon Dry CheOrg Loc2 [2019]	211209-rep	1.03	461.719	44.8271	-25.6356	211207	4.13	63.9415	1.54822	1.27276
LY088	Dongshuihu Village(P2)	Plot1 East	/	2019	Dry	Base: NPK 50kg (20:10:20) and organic 40kg, tiller: Urea 16kg	Chemical & Organic	Yueguang	Direct sowed	200 g/666 m2	Twice	ShiKeFeng	/	/	SDon Dry CheOrg Loc2 [2019]	211209-rep	1.06	503.261	47.4774	-25.5031	211207	4.25	62.1431	1.46219	1.41161
LY089	HeshengCoop- experimental fields(P1)	Plot1 North	/	2019	Dry	Control, 0kg	Control	Yueguang	Transplanted	No	Three times	Control	/	/	SDon Dry Ctr Loc1 [2019]	211209-rep	1.05	443.447	42.2331	-26.153	211207	4.19	56.98	1.35983	2.78331
LY090	HeshengCoop- experimental fields(P1)	Plot1 Middle	/	2019	Dry	Control, 0kg	Control	Yueguang	Transplanted	No	Three times	Control	/	/	SDon Dry Ctr Loc1 [2019]	211209-rep	1.075	453.158	41.959	-26.1441	211207	4.08	61.2497	1.50122	4.71802
LY091	HeshengCoop- experimental fields(P1)	Plot1 South	/	2019	Dry	Control, 0kg	Control	Yueguang	Transplanted	No	Three times	Control	/	/	SDon Dry Ctr Loc1 [2019]	211209-rep	1.12	450.449	40.2187	-26.533	211207	4.17	55.4948	1.33081	4.30729
LY092	HeshengCoop- experimental fields(P1)	Plot2 North	/	2019	Dry	Base: NPK 50kg Chemical fertiliser (17:17:17), tiller: urea 15kg, ear: urea 2.5kg	Chemical Fertiliser	Yueguang	Transplanted	No	Three times	JinZhengDa	/	/	SDon Dry Che Loc1 [2019]	211209-rep	1.08	458.823	42.4836	-25.9444	211208	4.31	63.2858	1.46835	3.18534
LY093	HeshengCoop- experimental fields(P1)	Plot2 Middle	/	2019	Dry	Base: NPK 50kg Chemical fertiliser (17:17:17), tiller: urea 15kg, ear: urea 2.5kg	Chemical Fertiliser	Yueguang	Transplanted	No	Three times	JinZhengDa	/	/	SDon Dry Che Loc1 [2019]	211209-rep	1.14	471.526	41.3619	-26.2595	211208	4.05	59.9057	1.47915	2.1064
LY094	HeshengCoop- experimental fields(P1)	Plot2 South	/	2019	Dry	Base: NPK 50kg Chemical fertiliser (17:17:17), tiller: urea 15kg, ear: urea 2.5kg	Chemical Fertiliser	Yueguang	Transplanted	No	Three times	JinZhengDa	/	/	SDon Dry Che Loc1 [2019]	211209-rep	1.03	438.688	42.5911	-26.3949	211208	4.21	59.1486	1.40495	2.34413
LY095	HeshengCoop- experimental fields(P1)	Plot3 North	/	2019	Dry	Base: NPK 30kg (17:17:17), tiller: urea 7.5kg	Chemical Fertiliser	Yueguang	Transplanted	No	Three times	JinZhengDa	/	/	SDon Dry Che Loc1 [2019]	211209-rep	1.14	461.579	40.4893	-26.4973	211208	4.29	53.0144	1.23577	2.95013
LY096	HeshengCoop- experimental fields(P1)	Plot3 Middle	/	2019	Dry	Base: NPK 30kg (17:17:17), tiller: urea 7.5kg	Chemical Fertiliser	Yueguang	Transplanted	No	Three times	JinZhengDa	/	/	SDon Dry Che Loc1 [2019]	211209-rep	1.06	452.745	42.7118	-26.268	211208	4.22	54.2583	1.28574	1.34777
LY097	HeshengCoop- experimental fields(P1)	Plot3 South	/	2019	Dry	Base: NPK 30kg (17:17:17), tiller: urea 7.5kg	Chemical Fertiliser	Yueguang	Transplanted	No	Three times	JinZhengDa	/	/	SDon Dry Che Loc1 [2019]	211209-rep	1.03	396.998	38.5435	-26.2794	211208	4.15	52.6511	1.2687	3.19447
LY114	Hesheng Coop	Plot1 North	/	2020	Paddy	Base: NPK 45kg (18:18:18) and organic 40kg, tiller: urea 17kg	Chemical & Organic	Lindao16	Transplanted	No	Three times	ShiKeFeng	/	/	SDon Pad CheOrg [2020]	211216	1.1	437.048	39.7317	-27.8598	211213	4.06	70.9547	1.74765	6.48473
LY115	Hesheng Coop	Plot1 Middle	/	2020	Paddy	Base: NPK 45kg (18:18:18) and organic 40kg, tiller: urea 17kg	Chemical & Organic	Lindao16	Transplanted	No	Three times	ShiKeFeng	/	/	SDon Pad CheOrg [2020]	211216	1.12	436.119	38.9392	-28.3003	211213	4.31	73.6364	1.7085	6.05508
LY116	Hesheng Coop	Plot1 South	/	2020	Paddy	Base: NPK 45kg (18:18:18) and organic 40kg, tiller: urea 17kg	Chemical & Organic	Lindao16	Transplanted	No	Three times	ShiKeFeng	/	/	SDon Pad CheOrg [2020]	211216	1.07	448.931	41.9562	-28.0399	211214	4.01	62.9654	1.57021	5.21551
LY117	Hesheng Coop	Plot2 North	/	2020	Paddy	Base: NPK 45kg (18:18:18) and organic 40kg, tiller: urea 17kg	Chemical & Organic	Lindao16	Transplanted	No	Three times	ShiKeFeng	/	/	SDon Pad CheOrg [2020]	211216	1	408.083	40.8083	-28.2477	211214	4.29	65.4982	1.52676	5.1029
LY118	Hesheng Coop	Plot2 Middle	/	2020	Paddy	Base: NPK 45kg (18:18:18) and organic 40kg, tiller: urea 17kg	Chemical & Organic	Lindao16	Transplanted	No	Three times	ShiKeFeng	/	/	SDon Pad CheOrg [2020]	211216	1.08	429.135	39.7347	-27.9634	211214	4.05	53.6912	1.32571	5.05438
LY119	Hesheng Coop	Plot2 South	/	2020	Paddy	Base: NPK 45kg (18:18:18) and organic 40kg, tiller: urea 17kg	Chemical & Organic	Lindao16	Transplanted	No	Three times	ShiKeFeng	/	/	SDon Pad CheOrg [2020]	211216	1.04	417.894	40.1821	-28.1908	211214	4.22	53.5376	1.26866	5.54412
LY120	Hesheng Coop	Plot3 North	/	2020	Paddy	Base: NPK 45kg (18:18:18) and organic 40kg, tiller: urea 17kg	Chemical & Organic	Lindao16	Transplanted	No	Three times	ShiKeFeng	/	/	SDon Pad CheOrg [2020]	211216	1.07	433.564	40.5325	-28.077	211214	4.32	63.8509	1.47803	5.44998
LY121	Hesheng Coop	Plot3 Middle	/	2020	Paddy	Base: NPK 45kg (18:18:18) and organic 40kg, tiller: urea 17kg	Chemical & Organic	Lindao16	Transplanted	No	Three times	ShiKeFeng	/	/	SDon Pad CheOrg [2020]	211216	1.03	418.028	40.5852	-27.9475	211214	4.36	66.8064	1.53226	5.48345
LY122	Hesheng Coop	Plot3 South	/	2020	Paddy	Base: NPK 45kg (18:18:18) and organic 40kg, tiller: urea 17kg	Chemical & Organic	Lindao16	Transplanted	No	Three times	ShiKeFeng	/	/	SDon Pad CheOrg [2020]	211216	1.04	422.539	40.6288	-28.1466	211214	4.08	55.2358	1.35382	5.58613
LY123	Hesheng Coop	Plot4 North	/	2020	Paddy	Base: NPK 45kg (18:18:18) and organic 40kg, tiller: urea 17kg	Chemical & Organic	Lindao16	Transplanted	No	Three times	ShiKeFeng	/	/	SDon Pad CheOrg [2020]	211216	1.06	431.122	40.6719	-27.7684	211214	4.11	65.2715	1.58811	5.41129
LY124	Hesheng Coop	Plot4 Middle	/	2020	Paddy	Base: NPK 45kg (18:18:18) and organic 40kg, tiller: urea 17kg	Chemical & Organic	Lindao16	Transplanted	No	Three times	ShiKeFeng	/	/	SDon Pad CheOrg [2020]	211216	1.05	432.071	41.1497	-27.8057	211214	4.28	66.8043	1.56085	5.79818
LY125	Hesheng Coop	Plot4 South	/	2020	Paddy	Base: NPK 45kg (18:18:18) and organic 40kg, tiller: urea 17kg	Chemical & Organic	Lindao16	Transplanted	No	Three times	ShiKeFeng	/	/	SDon Pad CheOrg [2020]	211216	1.03	425.236	41.2851	-27.919	211214	4.08	61.0687	1.4964	6.24456
LY126	Hesheng Coop	Plot5 North	/	2020	Paddy	Base: NPK 45kg (18:18:18) and organic 40kg, tiller: urea 17kg	Chemical & Organic	Lindao16	Transplanted	No	Three times	ShiKeFeng	/	/	SDon Pad CheOrg [2020]	211216	1.09	448.855	41.1793	-27.97	211214	4.08	60.4912	1.48263	5.39958
LY127	Hesheng Coop	Plot5 Middle	/	2020	Paddy	Base: NPK 45kg (18:18:18) and organic 40kg, tiller: urea 17kg	Chemical & Organic	Lindao16	Transplanted	No	Three times	ShiKeFeng	/	/	SDon Pad CheOrg [2020]	211216	1.05	428.264	40.787	-28.041	211214	4.02	55.9202	1.39105	6.16261
LY128	Hesheng Coop	Plot5 South	/	2020	Paddy	Base: NPK 45kg (18:18:18) and organic 40kg, tiller: urea 17kg	Chemical & Organic	Lindao16	Transplanted	No	Three times	ShiKeFeng	/	/	SDon Pad CheOrg [2020]	211216	1.11	472.492	42.5668	-27.9115	211214	4.24	59.313	1.39889	5.91654

## Sheet: Article
Supplementary Material 3 Rice Stable Carbon and Nitrogen Isotope Values as Potential Indicators of Watering and Manuring Regimes Rubi Wu, Eric J. Belfield, Yu Dong, Shangzong Feng, Xiangdong Fu, Nicholas P. Harberd, Fan Yang, Michael Charles, Amy Bogaard * Correspondence: Rubi Wu : rubi.wu2023@hotmail.com
